# Supplementary material for: Near-anoxia induces immobilization and sustains viability of sperm stored in ant queens
Source: PubMed Central journal article supplement (PMC9977914; doi:10.1038/s41598-023-29705-7), 2023-03-01
Supplement: 41598_2023_29705_MOESM1_ESM.pdf [file 41598_2023_29705_MOESM1_ESM.pdf]

Supplementary information

**Near-anoxia induces immobilization and sustains viability of sperm in ant queens**

Ayako Gotoh<sup>1,2,3</sup>, Mika Takeshima<sup>1</sup>, and Ken-ichi Mizutani<sup>4</sup>

<sup>1</sup> Department of Biology, Faculty of Science and Engineering, Konan University, Kobe 658-8501,  
Japan

<sup>2</sup> Institute for Integrative Neurobiology, Konan University, Kobe 658-8501, Japan

<sup>3</sup> Suntory Rising Stars Encouragement Program in life Sciences (SunRiSE)

<sup>4</sup> Laboratory of Stem Cell Biology, Graduate School of Pharmaceutical Sciences, Kobe Gakuin  
University, Kobe 650-8586, Japan

**Supplementary Movie 1**

Sperm motility under hypoxic PBS conditions (created using AnaeroPack<sup>®</sup> kenki pouch) and aerobic PBS control.

**Supplementary Movie 2**

Sperm motility in aerobic PBS control and anoxic PBS conditions (created by adding sodium sulfite).

**Supplementary Movie 3**

Motility of sperm cells preserved in anoxic conditions for 2, 4, and 8 h and subsequently exposed to aerobic PBS solutions.
